# Supplementary material for: Bacterial communities in the digester bed and liquid effluent of a microflush composting toilet system
Source: PeerJ journal article supplement (doi:10.7717/peerj.6077), 2018-12-06

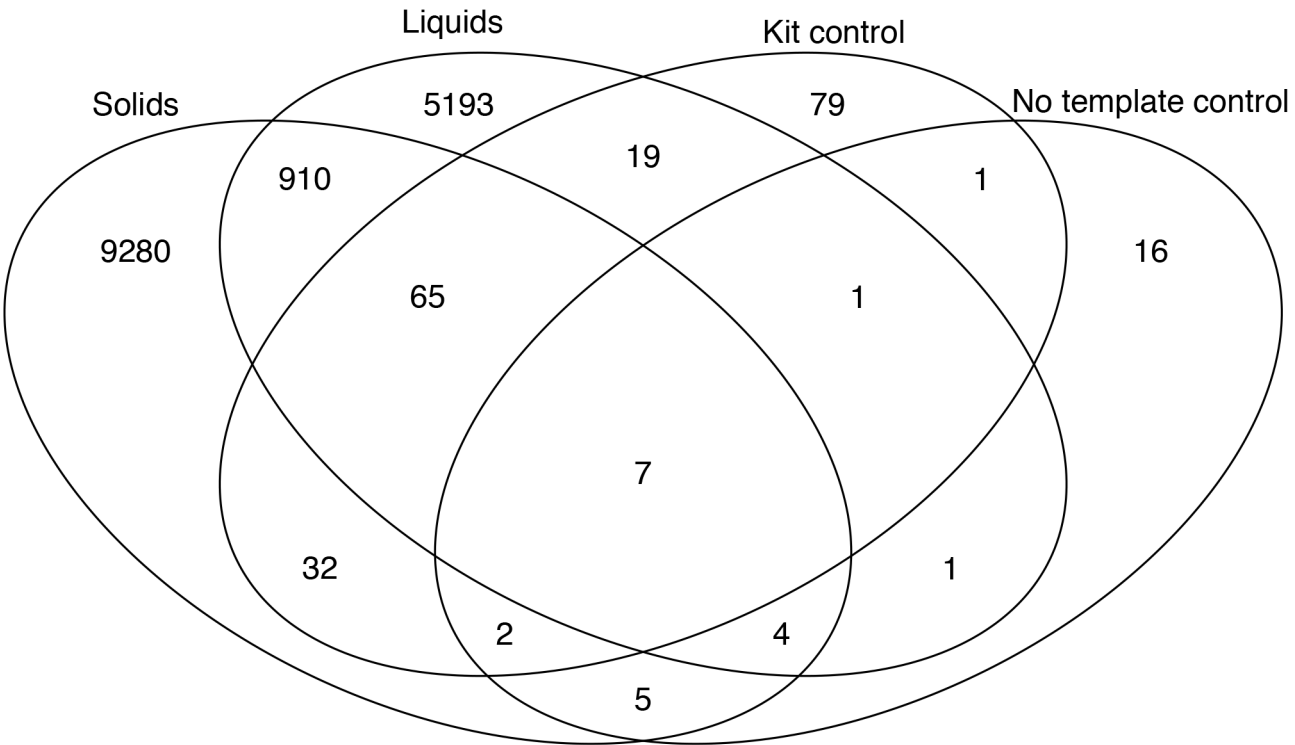

Supplement: SupplementaryFigure1.pdf [file SupplementaryFigure1.pdf]
