# Supplementary material for: Bacterial communities in the digester bed and liquid effluent of a microflush composting toilet system
Source: PeerJ journal article supplement (doi:10.7717/peerj.6077), 2018-12-06

**A**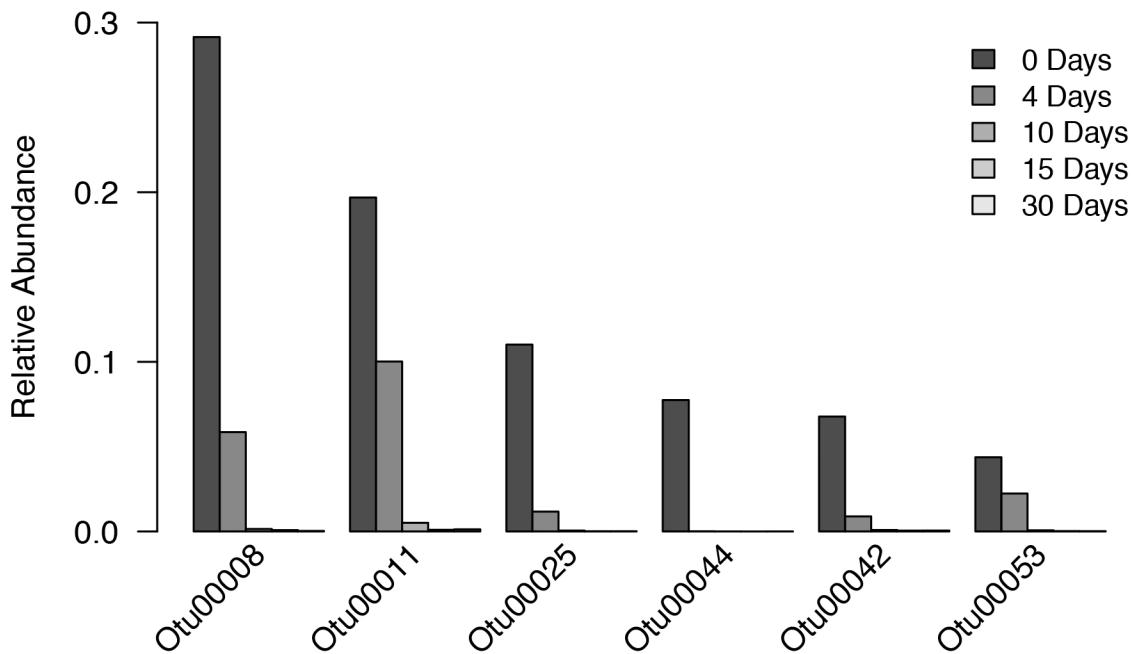**B**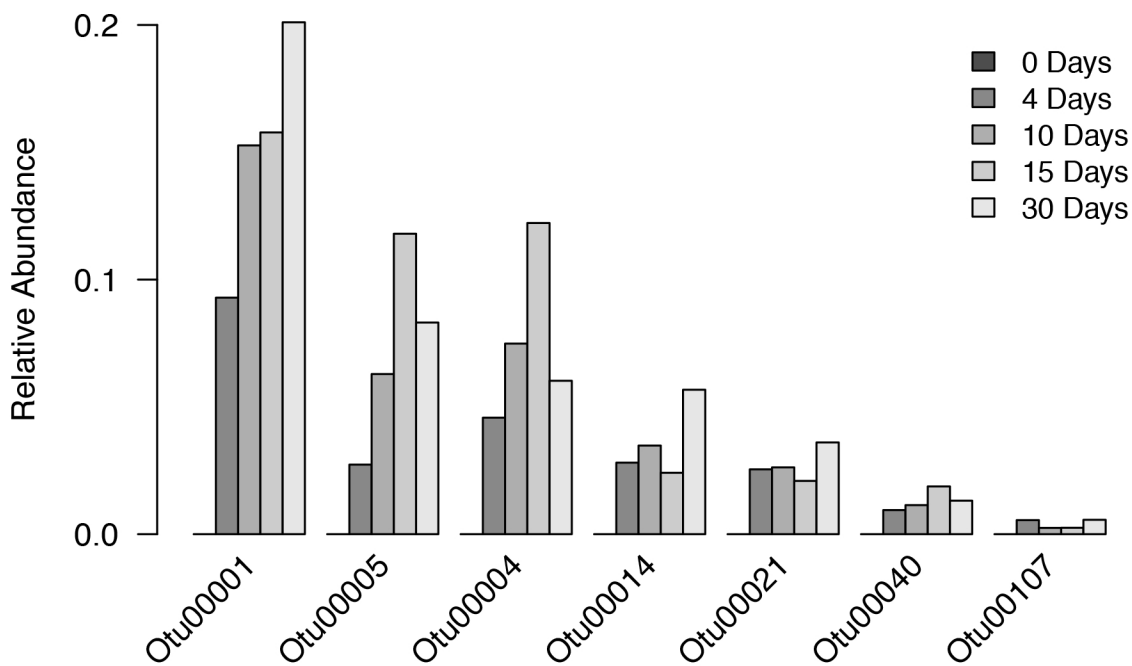

Supplement: SupplementaryFigure2.pdf [file SupplementaryFigure2.pdf]
